# Supplementary material for: Quantitative Proteomic Analyses Reveal That Energy Metabolism and Protein Biosynthesis Reinitiation are Responsible for the Initiation of Bolting Induced by High Temperature in Lettuce (Lactuca sativa L.)
Source: Research Square preprint supplement (doi:10.21203/rs.3.rs-60101/v1), 2020-10-30
Supplement: Supplementary file 1 [file d6c1d52aa4b8955c62f2ff4d.xlsx]

## Sheet: G VS CK显著差异分析
Accession	Description	Coverage	Unique Peptides	Peptides	PSMs	AAs	MW [kDa]	calc. pI	CK1/REF	CK2/REF	CK3/REF	AVERAGE CK	G1/REF	G2/REF	G3/REF	AVERAGE G	G/CK	T-TEST P VALUE
XP_023740264.1	MLP-like protein 423 [Lactuca sativa]	38.82	5	5	11	152	17.0457	4.98291	0.87822	0.860731	0.905539	0.881497	1.08119	1.11484	1.08251	1.09285	1.23976	#NAME?
XP_023760737.1	fasciclin-like arabinogalactan protein 13 [Lactuca sativa]	12.45	2	2	21	249	25.6333	5.47803	0.849862	0.744856	0.712738	0.769152	1.28216	1.25261	1.25756	1.26411	1.64351	#NAME?
XP_023766445.1	(RS)-norcoclaurine 6-O-methyltransferase-like [Lactuca sativa]	16.71	2	4	5	353	39.3537	5.5542	0.742601	0.856635	0.827415	0.808883	1.24528	1.24376	1.16063	1.21656	1.50399	#NAME?
XP_023771038.1	ferritin-4, chloroplastic-like [Lactuca sativa]	16.21	2	4	9	253	28.3542	5.2749	0.829773	0.792493	0.903499	0.841922	1.17041	1.25052	1.1697	1.19688	1.4216	#NAME?
XP_023757207.1	17.5 kDa class I heat shock protein-like [Lactuca sativa]	19.02	4	4	4	163	18.4884	6.81494	0.734959	0.700078	0.703825	0.712954	1.25658	1.27456	1.09205	1.20773	1.69398	#NAME?
XP_023766446.1	(RS)-norcoclaurine 6-O-methyltransferase-like [Lactuca sativa]	23.8	2	7	15	353	39.3829	5.30029	0.900622	0.769205	0.790107	0.819978	1.22619	1.1644	1.14212	1.17757	1.4361	#NAME?
XP_023739884.1	non-specific lipid-transfer protein 1-like [Lactuca sativa]	21.74	2	3	12	115	11.6307	8.25049	0.786113	0.722312	0.723214	0.74388	1.15657	1.34694	1.1478	1.2171	1.63616	#NAME?
XP_023729763.1	DNA damage-repair/toleration protein DRT100-like [Lactuca sativa]	50.82	12	16	46	366	39.6728	8.89502	0.935954	0.924687	0.879624	0.913422	1.06626	1.10869	1.14588	1.10694	1.21186	#NAME?
XP_023747005.1	farnesyl pyrophosphate synthase [Lactuca sativa]	24.85	8	8	14	342	39.3701	5.33838	0.917293	0.818367	0.864397	0.866685	1.06155	1.1519	1.08917	1.10087	1.27021	#NAME?
XP_023738096.1	Nitric oxide reductase transcription regulator NorR1 like [Actinidia chinensis var. chinensis]	39.71	3	3	7	68	7.60804	9.71533	0.838703	0.752532	0.704464	0.765233	1.27957	1.32088	1.09186	1.23077	1.60836	#NAME?
XP_023765200.1	14-3-3 protein 9-like [Lactuca sativa]	52.34	2	13	171	256	29.1484	4.83057	0.868663	0.786833	0.937867	0.864454	1.1846	1.17568	1.31438	1.22489	1.41695	#NAME?
XP_023766615.1	annexin D2-like [Lactuca sativa]	12.97	4	4	5	316	35.8015	7.23975	0.841949	0.724227	0.817178	0.794451	1.20359	1.13388	1.38057	1.23935	1.56	#NAME?
XP_023764523.1	probable carboxylesterase 5 [Lactuca sativa]	13.55	3	3	3	310	34.3684	5.66846	0.850151	0.86019	0.85565	0.855331	1.23656	1.24269	1.05306	1.17744	1.37659	#NAME?
XP_023742782.1	lactoylglutathione lyase GLX1 [Lactuca sativa]	31.16	9	9	16	292	32.6837	5.80811	0.971642	0.920621	0.849284	0.913849	1.15761	1.09413	1.18876	1.14683	1.25495	#NAME?
XP_023764763.1	40S ribosomal protein S11-2 [Lactuca sativa]	43.75	3	8	31	160	17.8945	10.3599	0.824414	0.797596	0.851004	0.824338	1.05849	1.21658	1.0331	1.10272	1.33771	#NAME?
XP_023740399.1	heat shock protein 83-like [Lactuca sativa]	31.68	6	21	106	704	80.9542	5.04639	0.807015	0.800447	0.846202	0.817888	1.25268	1.13631	1.02072	1.13657	1.38964	#NAME?
XP_023752680.1	universal stress protein PHOS34-like isoform X2 [Lactuca sativa]	34.04	5	7	23	235	25.7069	5.19873	0.926094	0.869863	0.876189	0.890715	1.14054	1.10559	1.01018	1.08544	1.21861	#NAME?
XP_023736808.1	secoisolariciresinol dehydrogenase-like [Lactuca sativa]	23.62	3	5	14	271	28.8469	6.21436	0.885814	0.781148	0.885163	0.850708	1.11573	1.05905	1.25723	1.144	1.34476	#NAME?
XP_023755248.1	NADP-dependent D-sorbitol-6-phosphate dehydrogenase-like [Lactuca sativa]	12.3	4	4	4	309	34.8309	6.62451	0.953176	0.902396	0.797321	0.884297	1.11302	1.14407	1.0431	1.10006	1.244	#NAME?
XP_023731958.1	vesicle transport v-SNARE 11-like [Lactuca sativa]	9.95	2	2	2	221	24.7722	9.34912	0.818487	0.735947	0.920519	0.824984	1.2139	1.145	1.4925	1.2838	1.55615	#NAME?
XP_023750266.1	pyruvate decarboxylase 1-like [Lactuca sativa]	16.39	4	8	20	604	65.1227	6.31592	0.957602	0.887948	0.671842	0.839131	1.16569	1.19586	1.12793	1.16316	1.38615	#NAME?
XP_023758713.1	pyruvate kinase 1, cytosolic [Lactuca sativa]	30.74	3	15	24	527	57.458	6.69775	1.00776	0.865934	0.737778	0.870489	1.19072	1.13608	1.3131	1.2133	1.39381	#NAME?
XP_023740656.1	aspartyl protease AED3-like [Lactuca sativa]	29.86	12	12	95	432	45.9853	9.18799	0.834961	0.811134	0.860975	0.83569	1.03275	1.26923	1.42007	1.24068	1.48462	#NAME?
XP_023731249.1	elongation factor 1-gamma-like [Lactuca sativa]	39	9	14	55	418	47.6862	6.17627	0.970376	0.860711	0.808012	0.8797	1.11649	1.17533	1.02959	1.10714	1.25854	#NAME?
XP_023754416.1	rRNA 2'-O-methyltransferase fibrillarin-like [Lactuca sativa]	11.04	2	2	3	154	14.9017	8.74854	0.772992	0.709251	0.657162	0.713135	1.1073	1.39491	1.80457	1.43559	2.01307	#NAME?
XP_023743487.1	aldehyde dehydrogenase family 2 member B4, mitochondrial-like [Lactuca sativa]	14.5	4	7	28	538	58.7513	7.63525	0.615016	0.653105	0.743182	0.670435	1.19406	1.41918	2.05903	1.55742	2.32301	#NAME?
PLY74879.1	17.3 kDa class I heat shock protein-like [Lactuca sativa]	9.68	2	2	2	155	17.7141	6.0874	0.816237	0.869231	0.866391	0.85062	1.12444	1.17377	1.53265	1.27695	1.5012	#NAME?
PLY74558.1	DNA damage-binding protein 1 [Lactuca sativa]	2.6	3	3	3	1077	120.676	5.35107	0.830167	0.704745	0.950565	0.828492	1.08602	1.14308	1.39765	1.20892	1.45918	#NAME?
XP_023736209.1	thaumatin-like protein [Lactuca sativa]	41.7	7	7	42	223	24.5001	5.93506	0.540693	0.759438	0.761012	0.687048	0.972355	1.66067	1.56874	1.40059	2.03856	#NAME?
XP_023746556.1	pyridoxine/pyridoxamine 5'-phosphate oxidase 1, chloroplastic isoform X4 [Lactuca sativa]	5.57	2	2	2	467	52.4313	6.41748	0.840847	0.921752	0.995363	0.919321	1.03333	1.11049	1.17195	1.10526	1.20225	#NAME?
PLY96779.1	cytochrome c1-2, heme protein, mitochondrial [Lactuca sativa]	25.09	5	5	14	291	31.872	5.8208	0.855672	0.902777	0.948889	0.902446	1.04154	1.12527	1.31385	1.16022	1.28564	#NAME?
XP_023743776.1	gibberellin-regulated protein 14-like, partial [Lactuca sativa]	33.33	4	4	9	114	11.995	9.26123	0.830584	0.771193	0.802868	0.801548	1.00968	1.32676	1.61101	1.31582	1.6416	#NAME?
XP_023758275.1	secretory carrier-associated membrane protein 2-like [Lactuca sativa]	9.42	2	2	8	308	34.4101	8.60205	0.882642	0.741016	0.940186	0.854615	1.08159	1.13398	1.42462	1.21339	1.41981	#NAME?
XP_023745438.1	histone H1-like [Lactuca sativa]	24.83	7	9	35	286	29.057	10.7114	0.894548	0.882541	0.735956	0.837682	1.2307	1.13045	0.962307	1.10782	1.32248	#NAME?
XP_023747284.1	dynein light chain 1, cytoplasmic [Lactuca sativa]	26.4	2	2	2	125	13.8468	7.44482	0.821099	0.698668	0.93324	0.817669	1.03214	1.31496	1.58048	1.30919	1.60113	#NAME?
XP_023729458.1	aromatic aminotransferase ISS1 [Lactuca sativa]	12.98	3	3	5	393	43.3304	6.55127	0.883071	0.791298	0.970562	0.881644	1.03888	1.13311	1.3337	1.16856	1.32544	#NAME?
XP_023742381.1	costunolide synthase [Lactuca sativa]	7.55	3	3	6	490	55.2319	8.35303	0.828594	0.798158	1.03992	0.88889	1.0599	1.16889	1.28913	1.17264	1.31922	#NAME?
XP_023733724.1	glyceraldehyde-3-phosphate dehydrogenase, cytosolic [Lactuca sativa]	44.87	2	15	304	341	37.0562	7.47412	0.85397	0.917506	0.862393	0.877956	1.0216	1.07008	1.31162	1.13443	1.29213	#NAME?
XP_023746109.1	mitochondrial adenine nucleotide transporter ADNT1-like [Lactuca sativa]	6.84	2	2	2	351	37.6859	9.36377	1.09818	1.09987	1.09588	1.09798	0.88722	0.866194	0.940722	0.898045	0.817909	#NAME?
XP_023742530.1	NADPH-dependent aldo-keto reductase, chloroplastic-like [Lactuca sativa]	18.35	6	6	9	316	35.5085	7.25439	1.14919	1.16756	1.07827	1.13168	0.914887	0.877749	0.855286	0.882641	0.779941	#NAME?
XP_023773123.1	non-symbiotic hemoglobin 2 [Lactuca sativa]	12.42	2	2	3	161	18.0233	6.1001	1.15418	1.10969	1.13332	1.1324	0.854501	0.85435	0.943907	0.884253	0.780868	#NAME?
XP_023758411.1	calvin cycle protein CP12-3, chloroplastic-like [Lactuca sativa]	28.68	4	4	5	136	15.3425	4.93213	1.47263	1.56859	1.18192	1.40772	0.562544	0.533392	0.477724	0.524554	0.372628	#NAME?
PLY92953.1	feruloyl CoA ortho-hydroxylase 2-like [Lactuca sativa]	15.66	6	6	7	364	40.6686	5.59229	1.16331	1.39897	1.25905	1.27378	0.772221	0.676732	0.561672	0.670208	0.526158	#NAME?
PLY62046.1	protein transport protein Sec24-like At3g07100 isoform X1 [Lactuca sativa]	7.98	2	7	11	1065	115.822	7.63525	1.23475	1.19791	1.06052	1.16439	0.831864	0.765408	0.788399	0.795224	0.682951	#NAME?
XP_023731917.1	cysteine proteinase 15A-like [Lactuca sativa]	4.93	2	2	2	365	40.1056	6.02393	1.1483	1.37436	1.24237	1.25501	0.78619	0.687315	0.585406	0.686304	0.546852	#NAME?
XP_023747760.1	RPM1-interacting protein 4-like [Lactuca sativa]	17.61	2	2	5	142	15.1852	7.44482	1.07416	1.06756	1.18336	1.10836	0.870185	0.861333	0.86432	0.865279	0.780685	#NAME?
XP_023746210.1	uncharacterized protein LOC111894368 [Lactuca sativa]	30.56	2	2	5	72	8.5393	9.24658	1.17591	1.26776	1.13497	1.19288	0.888413	0.822125	0.731496	0.814011	0.68239	#NAME?
XP_023744851.1	S-adenosylmethionine synthase 2-like [Lactuca sativa]	33.08	3	11	105	390	42.7958	6.94678	1.1061	1.18963	1.07948	1.12507	0.914274	0.836397	0.900736	0.883802	0.785552	#NAME?
XP_023754561.1	putative RNA-binding protein Luc7-like 2 [Lactuca sativa]	3.85	2	2	3	416	48.7609	8.76318	1.21943	1.25543	1.08735	1.1874	0.857941	0.780594	0.684428	0.774321	0.652113	#NAME?
XP_023756431.1	protein TsetseEP-like [Lactuca sativa]	97.58	18	18	206	165	18.2929	4.22119	1.34598	1.82361	1.2613	1.47696	0.487541	0.457552	0.461659	0.468917	0.317488	#NAME?
XP_023728441.1	neuromodulin [Lactuca sativa]	69.54	7	7	34	151	16.2138	3.75146	1.19296	1.19693	1.07491	1.15493	0.854152	0.78095	0.652746	0.762616	0.660311	#NAME?
XP_023749058.1	GDSL esterase/lipase At5g03610-like [Lactuca sativa]	6.39	2	2	4	360	39.6969	8.73389	1.24139	1.32407	1.08315	1.2162	0.762773	0.665263	0.837095	0.755044	0.620822	#NAME?
XP_023738480.1	reticulon-like protein B1 [Lactuca sativa]	10.36	3	3	6	251	28.1562	8.80713	1.20651	1.33933	1.16035	1.2354	0.768649	0.735751	0.465651	0.656684	0.531557	#NAME?
XP_023737838.1	TOM1-like protein 9 [Lactuca sativa]	4.69	2	2	2	639	70.1332	5.10986	1.11546	1.14301	1.26139	1.17329	0.892834	0.811195	0.63947	0.781166	0.665792	#NAME?
XP_023738035.1	aquaporin PIP2-2-like [Lactuca sativa]	17.3	2	4	63	289	30.7999	7.15186	1.4099	1.42064	1.03406	1.2882	0.763841	0.445963	0.513206	0.574337	0.445844	#NAME?
XP_023742797.1	major latex allergen Hev b 5-like [Lactuca sativa]	83.33	8	8	76	150	16.0757	3.82764	1.14664	1.26265	1.10433	1.17121	0.866551	0.763569	0.573759	0.734626	0.627239	#NAME?
XP_023769438.1	hevamine-A-like [Lactuca sativa]	7.24	2	2	5	304	32.7538	9.0708	1.07196	1.15429	1.15511	1.12712	0.920829	0.817902	0.692307	0.810346	0.718952	#NAME?
XP_023762137.1	protochlorophyllide reductase, chloroplastic-like [Lactuca sativa]	25.19	10	10	22	389	42.1936	9.0415	1.09845	1.19126	1.06117	1.11696	0.918443	0.870414	0.759392	0.849417	0.760472	#NAME?
XP_023751995.1	kirola-like [Lactuca sativa]	29.61	3	4	16	152	17.1496	6.07471	1.21604	1.19842	1.13321	1.18256	0.964687	0.74008	0.611925	0.77223	0.653017	#NAME?
XP_023742853.1	protein RESTRICTED TEV MOVEMENT 2-like [Lactuca sativa]	10.61	2	2	3	264	29.2476	9.48096	1.20468	1.12748	1.00618	1.11278	0.877562	0.879484	0.916559	0.891202	0.800877	#NAME?
XP_023754425.1	exopolygalacturonase-like [Lactuca sativa]	21.64	6	6	9	402	43.2157	7.81104	1.03842	1.14308	1.11448	1.09866	0.948794	0.957355	0.835957	0.914035	0.831954	#NAME?
XP_023765148.1	mitochondrial import inner membrane translocase subunit TIM44-2 [Lactuca sativa]	5.38	2	2	2	483	54.8241	8.23584	1.12101	1.16672	1.10111	1.12961	0.982298	0.81537	0.7099	0.835856	0.73995	#NAME?
XP_023753033.1	probable nucleolar protein 5-2 [Lactuca sativa]	9.08	2	5	14	573	63.3315	8.88037	0.997765	1.11929	1.1196	1.07888	0.937016	0.91863	0.841394	0.899013	0.833281	#NAME?
XP_023738028.1	aquaporin TIP1-1-like [Lactuca sativa]	8.66	2	2	9	254	26.1647	6.02393	1.32194	1.28582	1.09177	1.23318	0.94746	0.54168	0.427765	0.638968	0.518147	#NAME?
XP_023756814.1	40S ribosomal protein S5-like [Lactuca sativa]	45.85	2	10	95	205	22.893	9.36377	1.1557	1.12192	1.1052	1.12761	1.00679	0.891301	0.764334	0.887476	0.787042	#NAME?
XP_023739336.1	Methyltransferase FkbM [Cynara cardunculus var. scolymus]	8.1	2	2	2	321	35.8748	8.96826	1.10738	1.17934	1.0604	1.11571	0.941488	0.86436	0.675942	0.827264	0.741471	#NAME?
XP_023766954.1	nascent polypeptide-associated complex subunit beta-like [Lactuca sativa]	61.96	7	7	32	163	17.4792	7.25439	1.25146	1.25895	1.03986	1.18342	0.886538	0.820302	0.528115	0.744985	0.629518	#NAME?
XP_023750861.1	aldehyde dehydrogenase family 2 member C4-like isoform X2 [Lactuca sativa]	6.78	2	3	7	428	46.396	5.74463	1.10043	1.10008	1.47997	1.22683	0.800425	0.840455	0.65488	0.765253	0.623767	#NAME?
XP_023750992.1	glucan endo-1,3-beta-glucosidase, acidic-like [Lactuca sativa]	37.32	10	10	42	343	38.9458	6.69775	0.998258	1.42108	1.32805	1.24913	0.678886	0.780842	0.891749	0.783825	0.627497	#NAME?
XP_023764837.1	probable serine protease EDA2 [Lactuca sativa]	6.72	3	3	15	491	54.863	7.56201	1.09095	1.14939	1.06579	1.10205	1.00586	0.873258	0.807348	0.89549	0.812571	#NAME?
XP_023769447.1	reticulon-like protein B2 isoform X2 [Lactuca sativa]	14.85	4	4	5	229	25.5595	6.63916	1.17991	1.18687	1.16814	1.17831	0.898123	0.821331	0.440488	0.719981	0.611029	#NAME?
XP_023757123.1	venom phosphodiesterase 2-like [Lactuca sativa]	5.17	2	2	8	484	53.6151	6.01123	1.10604	1.15467	1.04548	1.10206	0.944169	0.908787	0.722469	0.858475	0.778971	#NAME?
XP_023734626.1	SAL1 phosphatase [Lactuca sativa]	8.6	3	3	4	407	43.2402	6.18896	1.06115	1.13313	1.08909	1.09446	0.970816	0.904033	0.751701	0.875517	0.799956	#NAME?
XP_023763859.1	probable xyloglucan endotransglucosylase/hydrolase protein B [Lactuca sativa]	31.16	9	10	28	292	33.9326	8.54346	1.17584	1.14399	1.03994	1.11992	0.994009	0.830681	0.719578	0.848089	0.757276	#NAME?
XP_023747246.1	V-type proton ATPase subunit C-like [Lactuca sativa]	15.78	6	6	8	374	42.5537	5.90967	1.1022	1.15412	0.99874	1.08502	0.929406	0.877434	0.704694	0.837178	0.771579	#NAME?
XP_023736080.1	protein IWS1 homolog [Lactuca sativa]	10.66	5	5	8	816	89.5293	4.70361	1.1595	1.13351	0.992469	1.09516	0.918579	0.958537	0.837874	0.904997	0.82636	#NAME?
XP_023749692.1	dnaJ homolog subfamily C GRV2 [Lactuca sativa]	2.09	5	5	5	2538	278.133	6.15088	1.00295	1.02669	1.19288	1.07417	0.876245	0.920566	0.795292	0.864034	0.804371	#NAME?
XP_023770654.1	microtubule-associated protein 70-1-like isoform X2 [Lactuca sativa]	5.6	2	2	4	500	55.7041	9.12939	1.16964	1.29988	1.01881	1.16277	0.950018	0.787147	0.607898	0.781688	0.672261	#NAME?
XP_023735661.1	imidazole glycerol phosphate synthase hisHF, chloroplastic [Lactuca sativa]	6.52	3	3	5	583	63.5696	6.04932	1.06634	1.18031	1.31365	1.18676	1.02145	0.785607	0.715961	0.841007	0.708656	#NAME?
XP_023764544.1	5-oxoprolinase [Lactuca sativa]	4.6	4	4	5	1261	137.476	6.23975	1.12522	1.17821	1.03009	1.11118	0.964883	0.858671	0.679718	0.834424	0.750937	#NAME?
XP_023759641.1	calcium-dependent protein kinase 1-like [Lactuca sativa]	3.87	2	2	4	569	63.4991	5.78271	1.14453	1.14768	1.01274	1.10165	0.953835	0.911709	0.738932	0.868159	0.788056	#NAME?
XP_023745793.1	RGG repeats nuclear RNA binding protein A-like [Lactuca sativa]	19.89	3	5	9	352	37.9669	7.26904	1.23608	1.31526	1.05344	1.2016	0.958504	0.699565	0.413503	0.690524	0.574672	#NAME?
XP_023737552.1	60S ribosomal protein L32-1-like [Lactuca sativa]	48.12	3	7	68	133	15.6976	10.5063	1.12775	1.17133	1.05071	1.1166	0.960617	0.891945	0.668109	0.840224	0.752487	#NAME?
XP_023729637.1	adenylate kinase 4 isoform X2 [Lactuca sativa]	33.64	2	6	11	220	24.0538	8.88037	1.08524	1.23741	1.05887	1.12717	0.960378	0.777957	0.58258	0.773638	0.686352	#NAME?
XP_023757887.1	kirola-like [Lactuca sativa]	18	2	2	3	150	17.1538	5.33838	1.13986	1.19831	1.04778	1.12865	0.98466	0.835123	0.646284	0.822022	0.728325	#NAME?
XP_023743808.1	cysteine protease XCP2-like [Lactuca sativa]	6.53	2	3	3	352	39.7444	6.07471	1.21815	1.31903	0.987881	1.17502	0.926018	0.774235	0.527599	0.742617	0.632004	#NAME?
PLY79129.1	aspartyl protease family protein At5g10770-like [Lactuca sativa]	6.8	2	2	8	397	41.5346	8.04541	1.09127	1.13676	1.05865	1.09556	0.977143	0.910048	0.722409	0.869867	0.793992	#NAME?
XP_023766691.1	cysteine proteinase inhibitor A-like [Lactuca sativa]	30.61	2	3	10	98	10.7515	7.50342	1.16698	1.2126	1.02054	1.13337	0.939815	0.850376	0.589087	0.793092	0.699764	#NAME?
XP_023756387.1	proteasome subunit beta type-5-B [Lactuca sativa]	28.94	7	7	18	273	29.2813	5.47803	1.08363	1.19833	0.977118	1.08636	0.927702	0.865131	0.72147	0.838101	0.771477	#NAME?
XP_023736098.1	N-terminal kinase-like protein [Lactuca sativa]	2.52	2	2	4	834	90.1814	7.25439	1.1314	1.19341	0.996233	1.10701	0.930879	0.882637	0.666496	0.826671	0.746757	#NAME?
XP_023766750.1	protein STRUBBELIG-RECEPTOR FAMILY 7-like [Lactuca sativa]	5.34	4	4	4	712	76.5497	6.90283	1.0985	1.056	1.05492	1.06981	0.982345	0.901119	0.754325	0.879263	0.821891	#NAME?
XP_023756587.1	serine hydroxymethyltransferase 4 [Lactuca sativa]	37.15	16	17	126	471	51.8423	7.91357	1.1142	1.14376	1.00309	1.08702	0.960882	0.918786	0.760909	0.880192	0.809733	#NAME?
XP_023762008.1	V-type proton ATPase catalytic subunit A-like [Lactuca sativa]	48.64	8	30	169	623	68.6449	5.40186	1.04831	1.16882	1.04919	1.08877	0.903878	0.890382	0.611952	0.802071	0.736674	#NAME?
